# Supplementary material for: Luzindole and 4P-PDOT block the effect of melatonin on bovine granulosa cell apoptosis and cell cycle depending on its concentration
Source: PeerJ. 2021 Mar 8;9:e10627. doi: 10.7717/peerj.10627 (PMC7950190; doi:10.7717/peerj.10627)
Supplement: Supplemental Information 1 — Raw data for Ct value of 10 target genes and 1 reference gene, cell cycle, cell apoptosis and antioxidant related genes in four experimental group: control, melatonin group, melatonin plus 4P-PDOT group and melatonin plus luzindole group. [file peerj-09-10627-s001.xlsx]

## Sheet: bax
	CT value of Bax	CT value of β-actin
Control	22.7199	14.7385
Control	22.2337	14.4288
Control	22.1452	14.3082
10-5M Melatonin	22.4178	14.0045
10-5M Melatonin	22.5671	14.1402
10-5M Melatonin	23.0525	14.6464
10-5M melatonin plus luzindole	22.911	14.5353
10-5M melatonin plus luzindole	23.3793	15.1327
10-5M melatonin plus luzindole	23.1592	14.6824
10-5M melatonin plus 4P-PDOT	22.4474	14.1049
10-5M melatonin plus 4P-PDOT	23.0269	14.7628
10-5M melatonin plus 4P-PDOT	22.7729	14.5388

## Sheet: Bcl2
	CT value of Bcl2	CT value of β-actin
Control	24.3839	14.0562
Control	24.4885	14.1102
Control	24.0054	14.0252
10-5M Melatonin	24.1856	14.5008
10-5M Melatonin	24.6554	14.9681
10-5M Melatonin	25.0839	15.391
10-5M melatonin plus luzindole	24.4532	14.8833
10-5M melatonin plus luzindole	25.9285	16.511
10-5M melatonin plus luzindole	25.3943	16.0609
10-5M melatonin plus 4P-PDOT	23.9619	14.2744
10-5M melatonin plus 4P-PDOT	24.6074	14.9479
10-5M melatonin plus 4P-PDOT	24.5116	14.7975

## Sheet: Bcl-xl
	CT value of Bcl-xl	CT value of β-actin
Control	26.4839	14.1837
Control	26.6197	14.3526
Control	26.4992	14.5824
10-5M Melatonin	28.19	16.5969
10-5M Melatonin	27.0992	15.6949
10-5M Melatonin	27.4419	15.9583
10-5M melatonin plus luzindole	28.6004	15.474
10-5M melatonin plus luzindole	28.8523	16.1846
10-5M melatonin plus luzindole	28.7886	16.1478
10-5M melatonin plus 4P-PDOT	26.7471	14.2826
10-5M melatonin plus 4P-PDOT	27.8039	15.2855
10-5M melatonin plus 4P-PDOT	28.1526	15.2764

## Sheet: Caspase-3
	CT value of Caspase-3	CT value of β-actin
Control	23.7392	14.642
Control	23.5358	14.5097
Control	23.4215	14.41
10-5M Melatonin	24.1288	14.1732
10-5M Melatonin	25.3636	15.1685
10-5M Melatonin	25.1555	15.0835
10-5M melatonin plus luzindole	24.9598	15.0645
10-5M melatonin plus luzindole	24.876	15.0255
10-5M melatonin plus luzindole	25.9433	15.9135
10-5M melatonin plus 4P-PDOT	23.9682	14.2651
10-5M melatonin plus 4P-PDOT	25.2261	15.1241
10-5M melatonin plus 4P-PDOT	24.8849	14.8754

## Sheet: p53
	CT value of p53	CT value of β-actin
Control	23.3822	14.3649
Control	23.975	14.7776
Control	23.8104	14.7183
10-5M Melatonin	24.78	14.7593
10-5M Melatonin	25.078	15.2773
10-5M Melatonin	24.9516	15.1541
10-5M melatonin plus luzindole	24.8297	15.1759
10-5M melatonin plus luzindole	27.5654	17.6355
10-5M melatonin plus luzindole	25.7196	15.9069
10-5M melatonin plus 4P-PDOT	23.8976	14.4729
10-5M melatonin plus 4P-PDOT	25.2331	15.666
10-5M melatonin plus 4P-PDOT	24.835	15.3181

## Sheet: GPX4
	CT value of GPX4	CT value of β-actin
Control	18.7553	13.8691
Control	18.9402	14.2367
Control	19.3008	14.4404
10-5M Melatonin	18.5996	14.1856
10-5M Melatonin	19.3081	14.9903
10-5M Melatonin	19.3881	15.0962
10-5M melatonin plus luzindole	19.7157	15.3537
10-5M melatonin plus luzindole	21.1904	16.8531
10-5M melatonin plus luzindole	20.1273	15.7201
10-5M melatonin plus 4P-PDOT	18.9534	14.5765
10-5M melatonin plus 4P-PDOT	19.6557	15.2827
10-5M melatonin plus 4P-PDOT	19.4233	14.9826

## Sheet: SOD1
	CT value of SOD1	CT value of β-actin
Control	18.8239	14.029
Control	18.7428	14.1105
Control	18.6932	14.1721
10-5M Melatonin	18.189	14.0651
10-5M Melatonin	19.2809	15.0583
10-5M Melatonin	19.1449	15.0062
10-5M melatonin plus luzindole	19.4017	15.1729
10-5M melatonin plus luzindole	20.3852	15.9594
10-5M melatonin plus luzindole	19.7384	15.3699
10-5M melatonin plus 4P-PDOT	19.1946	14.74
10-5M melatonin plus 4P-PDOT	19.4222	14.9915
10-5M melatonin plus 4P-PDOT	19.3744	14.83

## Sheet: CyclinD1
	CT value of CyclinD1	CT value of β-actin
Control	23.0012	16.4427
Control	20.7938	14.1805
Control	22.7616	16.0841
10-5M Melatonin	21.4713	15.0035
10-5M Melatonin	21.4997	14.9331
10-5M Melatonin	21.4012	15.1568
10-5M melatonin plus luzindole	21.604	15.2592
10-5M melatonin plus luzindole	20.8892	14.2651
10-5M melatonin plus luzindole	20.9557	14.5468
10-5M melatonin plus 4P-PDOT	21.3835	14.9516
10-5M melatonin plus 4P-PDOT	21.3268	14.8622
10-5M melatonin plus 4P-PDOT	21.2336	14.7636

## Sheet: CyclinE1
	CT value of CyclinE1	CT value of β-actin
Control	26.7006	15.5371
Control	25.0887	13.95
Control	28.1052	16.9883
10-5M Melatonin	26.2794	14.9893
10-5M Melatonin	26.0538	14.8118
10-5M Melatonin	25.9807	14.904
10-5M melatonin plus luzindole	26.0736	14.9038
10-5M melatonin plus luzindole	25.6247	14.5841
10-5M melatonin plus luzindole	25.3885	14.0984
10-5M melatonin plus 4P-PDOT	25.9423	14.8718
10-5M melatonin plus 4P-PDOT	26.0013	15.0548
10-5M melatonin plus 4P-PDOT	25.8894	14.776

## Sheet: P21
	CT value of P21	CT value of β-actin
Control	28.1762	16.1981
Control	25.6374	13.8856
Control	27.5729	15.8031
10-5M Melatonin	26.8766	14.7402
10-5M Melatonin	26.9906	14.8092
10-5M Melatonin	26.9745	14.8449
10-5M melatonin plus luzindole	26.9073	14.9435
10-5M melatonin plus luzindole	26.1057	14.2513
10-5M melatonin plus luzindole	25.5423	13.8085
10-5M melatonin plus 4P-PDOT	26.8501	14.9003
10-5M melatonin plus 4P-PDOT	26.6964	14.9094
10-5M melatonin plus 4P-PDOT	26.5232	14.698
