# Supplementary material for: Luzindole and 4P-PDOT block the effect of melatonin on bovine granulosa cell apoptosis and cell cycle depending on its concentration
Source: PeerJ. 2021 Mar 8;9:e10627. doi: 10.7717/peerj.10627 (PMC7950190; doi:10.7717/peerj.10627)
Supplement: Supplemental Information 2 — Raw data for Ct value of 10 target genes and 1 reference gene, cell cycle, cell apoptosis and antioxidant related genes in four experimental group: control, melatonin group, melatonin plus 4P-PDOT group and melatonin plus luzindole group. [file peerj-09-10627-s002.xlsx]

## Sheet: Bax
	CT value of Bax	CT value of β-actin
Control	28.0635	19.6866
Control	25.762	17.6349
Control	26.846	18.6436
10-9M Melatonin	23.9455	15.1046
10-9M Melatonin	23.9455	15.017
10-9M Melatonin	23.5743	14.6291
10-9M melatonin plus luzindole	22.3891	14.8735
10-9M melatonin plus luzindole	20.8157	13.6472
10-9M melatonin plus luzindole	21.648	14.1006
10-9M melatonin plus 4P-PDOT	21.1327	13.5435
10-9M melatonin plus 4P-PDOT	21.5728	13.856
10-9M melatonin plus 4P-PDOT	22.0186	14.0512

## Sheet: Bcl2
	CT value of Bcl2	CT value of β-actin
Control	29.2844	19.7532
Control	26.4384	16.7902
Control	23.0414	13.9582
10-9M Melatonin	23.0325	14.2231
10-9M Melatonin	23.0325	14.2341
10-9M Melatonin	23.0403	14.2526
10-9M melatonin plus luzindole	23.2268	13.1925
10-9M melatonin plus luzindole	22.6854	12.6477
10-9M melatonin plus luzindole	22.9739	13.0982
10-9M melatonin plus 4P-PDOT	22.5106	12.5178
10-9M melatonin plus 4P-PDOT	22.6198	12.725
10-9M melatonin plus 4P-PDOT	22.8923	13.0791

## Sheet: Bcl-xl
	CT value of Bcl-xl	CT value of β-actin
Control	34.2417	19.2781
Control	33.0068	17.9598
Control	29.0367	14.0219
10-9M Melatonin	29.1361	14.9171
10-9M Melatonin	29.1528	14.8318
10-9M Melatonin	29.2365	14.9736
10-9M melatonin plus luzindole	28.608	13.8307
10-9M melatonin plus luzindole	28.3195	13.1817
10-9M melatonin plus luzindole	28.6606	13.3405
10-9M melatonin plus 4P-PDOT	28.5718	13.453
10-9M melatonin plus 4P-PDOT	28.4324	13.6003
10-9M melatonin plus 4P-PDOT	28.428	13.4536

## Sheet: Caspase-3
	CT value of Caspase-3	CT value of β-actin
Control	26.4426	16.5437
Control	27.8102	17.759
Control	24.0351	14.1194
10-9M Melatonin	28.1462	17.4485
10-9M Melatonin	25.4458	14.6452
10-9M Melatonin	25.3152	14.5479
10-9M melatonin plus luzindole	24.1207	14.3418
10-9M melatonin plus luzindole	24.0718	13.9335
10-9M melatonin plus luzindole	23.7448	13.6824
10-9M melatonin plus 4P-PDOT	23.6832	13.539
10-9M melatonin plus 4P-PDOT	23.8018	13.7642
10-9M melatonin plus 4P-PDOT	23.5852	13.6089

## Sheet: p53
	CT value of p53	CT value of β-actin
Control	38.2254	25.514
Control	37.8552	25.2312
Control	37.7493	25.2082
10-9M Melatonin	36.0377	22.7077
10-9M Melatonin	37.1448	23.667
10-9M Melatonin	37.1325	23.7352
10-9M melatonin plus luzindole	34.3256	21.6745
10-9M melatonin plus luzindole	34.231	21.6786
10-9M melatonin plus luzindole	34.2316	21.6283
10-9M melatonin plus 4P-PDOT	34.1628	21.5733
10-9M melatonin plus 4P-PDOT	33.7542	20.9843
10-9M melatonin plus 4P-PDOT	34.1797	21.8511

## Sheet: GPX4
	CT value of GPX4	CT value of β-actin
Control	18.6657	13.9393
Control	19.1544	14.4588
Control	18.9113	14.4404
10-9M Melatonin	18.6955	14.4765
10-9M Melatonin	19.1568	15.1368
10-9M Melatonin	19.2557	15.0962
10-9M melatonin plus luzindole	19.5928	15.2093
10-9M melatonin plus luzindole	19.7368	15.2899
10-9M melatonin plus luzindole	20.0986	15.4201
10-9M melatonin plus 4P-PDOT	19.2673	14.6982
10-9M melatonin plus 4P-PDOT	19.3467	14.8734
10-9M melatonin plus 4P-PDOT	19.0724	14.5789

## Sheet: SOD1
	CT value of SOD1	CT value of β-actin
Control	18.5278	14.2688
Control	18.9782	14.4891
Control	18.4897	14.2672
10-9M Melatonin	18.6785	14.9564
10-9M Melatonin	19.0935	15.2729
10-9M Melatonin	19.3789	15.6763
10-9M melatonin plus luzindole	19.7762	15.5542
10-9M melatonin plus luzindole	20.1356	15.6892
10-9M melatonin plus luzindole	19.4539	15.4893
10-9M melatonin plus 4P-PDOT	19.589	15.5765
10-9M melatonin plus 4P-PDOT	19.7824	15.4675
10-9M melatonin plus 4P-PDOT	19.5679	15.409

## Sheet: CyclinD1
	CT value of CyclinD1	CT value of β-actin
Control	22.7043	17.6827
Control	19.8973	15.2207
Control	21.0443	15.9759
10-9M Melatonin	19.8999	15.1268
10-9M Melatonin	20.5722	15.9211
10-9M Melatonin	19.9989	15.7283
10-9M melatonin plus luzindole	23.6616	19.1017
10-9M melatonin plus luzindole	24.6327	20.1576
10-9M melatonin plus luzindole	21.3145	16.1441
10-9M melatonin plus 4P-PDOT	23.2056	18.1221
10-9M melatonin plus 4P-PDOT	23.9105	19.3171
10-9M melatonin plus 4P-PDOT	23.5155	18.3399

## Sheet: Cycline1
	CT value of CyclinE1	CT value of β-actin
Control	27.2637	16.1455
Control	25.5226	14.5172
Control	26.1354	15.2854
10-9M Melatonin	26.2121	14.13
10-9M Melatonin	26.7048	14.4298
10-9M Melatonin	26.3251	14.1245
10-9M melatonin plus luzindole	29.1439	18.3176
10-9M melatonin plus luzindole	30.4945	19.6701
10-9M melatonin plus luzindole	26.5963	15.8371
10-9M melatonin plus 4P-PDOT	28.6486	17.6593
10-9M melatonin plus 4P-PDOT	30.3499	19.5901
10-9M melatonin plus 4P-PDOT	28.9346	17.9433

## Sheet: P21
	CT value of P21	CT value of β-actin
Control	22.6328	16.738
Control	20.0572	13.8884
Control	20.6158	14.8456
10-9M Melatonin	20.3182	14.9445
10-9M Melatonin	20.3145	14.9098
10-9M Melatonin	19.2667	14.305
10-9M melatonin plus luzindole	22.4563	16.9536
10-9M melatonin plus luzindole	23.561	18.2689
10-9M melatonin plus luzindole	22.4377	16.7748
10-9M melatonin plus 4P-PDOT	22.5596	17.1362
10-9M melatonin plus 4P-PDOT	23.9716	18.4258
10-9M melatonin plus 4P-PDOT	23.5403	18.1408
